# Supplementary material for: Environmentally benign enhanced hydrogen production via lethal H2S under natural sunlight using hierarchical nanostructured bismuth sulfide
Source: Royal Society of Chemistry journal article supplement (doi:10.1039/c4ra07143c), 2014-01-01
Supplement: c4ra07143c1.pdf [file c4ra07143c1.pdf]

## Electronic Supplementary Information

### I) Experimental Setup for Measurements of Photo responsive Properties of $\text{Bi}_2\text{S}_3$ Nanostructures

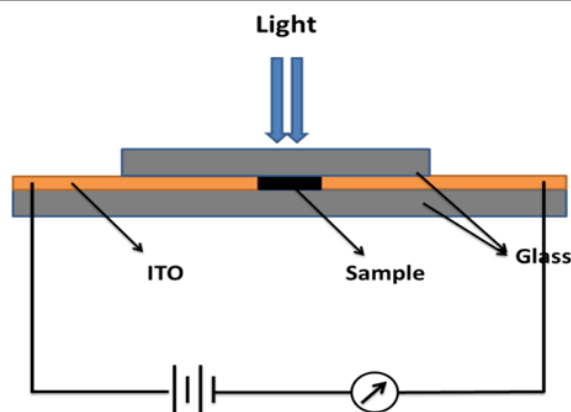

Figure SI 1 Experimental Setup for Measurements of Photo responsive Properties of  $\text{Bi}_2\text{S}_3$  Nanostructures

### II) Experimental Setup for measurements of hydrogen production

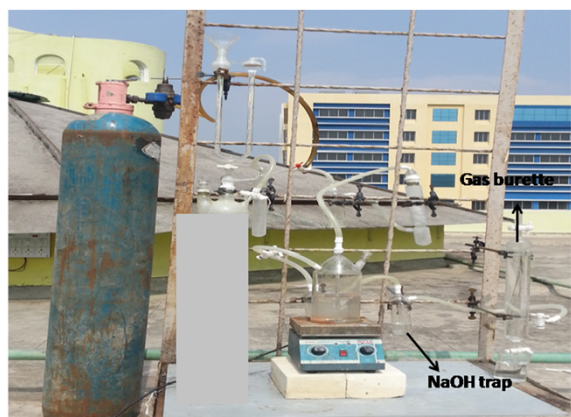

Figure SI 2 Experimental Setup for Measurements of measurements of hydrogen production from  $\text{H}_2\text{S}$  under sunlight

### III) Table of comparative study of $\text{H}_2$ generation

| Photocatalyst                            | Amount of $\text{H}_2$ generation [ $\text{mmol hr}^{-1} \text{g}^{-1}$ ] | Reference no in manuscript |
|------------------------------------------|---------------------------------------------------------------------------|----------------------------|
| CdS                                      | 5.89                                                                      | 5                          |
| $\text{Cd}_{0.9}\text{Zn}_{0.1}\text{S}$ | 8.32                                                                      | 10(d)                      |
| $\text{CdIn}_2\text{S}_4$                | 6.96                                                                      | 10(e)                      |
| $\text{CdIn}_2\text{S}_4$                | 6.476                                                                     | 6                          |
| $\text{CdLa}_2\text{S}_4$                | 5.104                                                                     | 10(b)                      |
| ZnS                                      | 2.050                                                                     | 10(c)                      |
| $\text{ZnIn}_2\text{S}_4$                | 10.574                                                                    | 10 (a)                     |
| $\text{Bi}_2\text{S}_3$                  | 8.880                                                                     | Present work               |

### IV) Gas chromatographic study for hydrogen detection

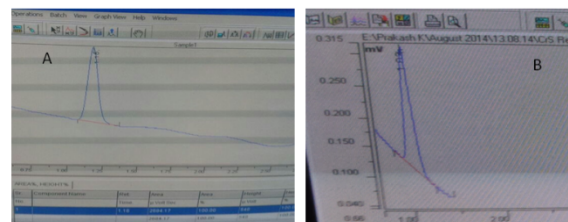

Figure SI 3 gas chromatograph for hydrogen (A) for  $\text{H}_2\text{S}$  (B) for  $\text{H}_2\text{O}$

### V) XRD of nanostructured $\text{Bi}_2\text{S}_3$ after photocatalysis.

Figure SI 3 (RS1-RS3) shows the XRD pattern for sample S1, S2 and S3 taken after photocatalytic hydrogen generation. Figure shows orthorhombic crystal structure and it is consistent with XRD pattern taken before photocatalytic hydrogen generation. Figure SI 3 and Figure 1 in revised manuscript reveals that there is no structural change in  $\text{Bi}_2\text{S}_3$  before and after photocatalysis.

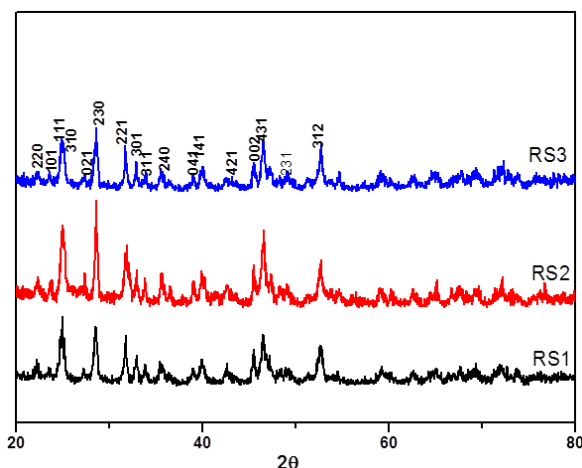

Figure SI 3 XRD pattern of Nanocrystalline  $\text{Bi}_2\text{S}_3$  samples RS1, RS2 and RS3 after photocatalysis

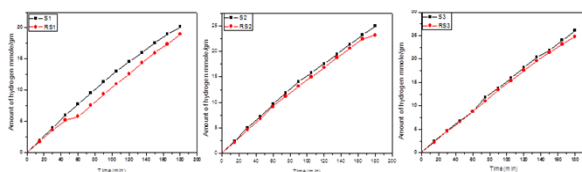

Figure SI 4 Hydrogen evolution of Nanocrystalline  $\text{Bi}_2\text{S}_3$  samples (S1, S2, S3) and (RS1, RS2, RS3) reused catalyst respectively.

### VI) Hydrogen evolution of reused $\text{Bi}_2\text{S}_3$ samples

The reproducibility of the photocatalyst has also been examined by reusing the photocatalyst sample (S1, S2 and S3). Figure SI 4 shows the hydrogen evolution of nanocrystalline  $\text{Bi}_2\text{S}_3$  samples (S1, S2, S3) and (RS1, RS2, RS3) reused catalyst, respectively.
